# Supplementary material
Source: publisher site journal article supplement (https://www.kjim.org/upload/media/kjim-2025-088-Supplementary-Table-2.pdf)
Supplement: Supplementary file 1 [file kjim-2025-088-Supplementary-Table-2.pdf]

**Supplementary Table 2. The operational definition of variables**

|                         | ICD-10 code                  | Definition                                                                                                                                                                                                |
|-------------------------|------------------------------|-----------------------------------------------------------------------------------------------------------------------------------------------------------------------------------------------------------|
| Underlying diseases     |                              |                                                                                                                                                                                                           |
| Hypertension            | I10, I11                     | Admission $\geq$ 1 or outpatient clinic $\geq$ 1, with anti-hypertensive medication<br>Systolic blood pressure $\geq$ 140 mmHg or diastolic blood pressure $\geq$ 90 mmHg in health screening             |
| Diabetes                | E11, E12, E13, E14           | Admission $\geq$ 1 or outpatient clinic $\geq$ 1, with anti-diabetic medication<br>Fasting blood glucose $\geq$ 126 mg/dL in health screening                                                             |
| Dyslipidemia            | E78                          | Admission $\geq$ 1 or outpatient clinic $\geq$ 1, with dyslipidemia medication<br>Total cholesterol $\geq$ 240 mg/dL or triglyceride $\geq$ 500 mg/dL or HDL-cholesterol $<$ 40 mg/dL in health screening |
| Ischemic heart disease  | I20, I21, I22, I23, I24, I25 | Admission $\geq$ 1 or outpatient clinic $\geq$ 1                                                                                                                                                          |
| Cerebrovascular disease | I60, I61, I62, I63, I64      | Admission $\geq$ 1 or outpatient clinic $\geq$ 1                                                                                                                                                          |
| COPD                    | J41, J42, J43, J44           | Admission $\geq$ 1 or outpatient clinic $\geq$ 1                                                                                                                                                          |
| Depression              | F32, F33                     | Admission $\geq$ 1 or outpatient clinic $\geq$ 1                                                                                                                                                          |

ICD, International Classification of Diseases; COPD, chronic obstructive pulmonary disease; HDL, high density lipoprotein.
